# Supplementary material for: MiR-92 Family Members Form a Cluster Required for Notochord Tubulogenesis in Urochordate Ciona savignyi
Source: PubMed Central journal article supplement (PMC8001136; doi:10.3390/genes12030406), 2021-03-12
Supplement: genes-12-00406-s001.pdf [file genes-12-00406-s001.pdf]

## Supplementary Materials:

**Table S1.** The sequence of the gRNAs for electroporation.

| gRNA         | The sequence of gRNA     | Position                                                                          |
|--------------|--------------------------|-----------------------------------------------------------------------------------|
| sgRNA-mm     | CACCTGTCCCGGCCGATCTTGGG  | reftig_1 DNA:reftig<br>reftig:CSAV2.0:reftig_1:1:6668731:1 REF<br>1335597-1335619 |
| sgRNA-Dicer  | TAAACAGTATTGCACCTGTCCCGG | reftig_1 DNA:reftig<br>reftig:CSAV2.0:reftig_1:1:6668731:1 REF<br>1335586-1335608 |
| sgRNA-Drosha | ATCAAGCGTATATAGCAGTCAGG  | reftig_1 DNA:reftig<br>reftig:CSAV2.0:reftig_1:1:6668731:1 REF<br>1335529-1335551 |
| Control gRNA | GCTTTGCTACGATCTACATT     |                                                                                   |

**Table S2.** The distribution traits of miR-92 among different species.

| Species                         | Name of miRNA | Gene Location                 | Gene Organization | +/- Strand |
|---------------------------------|---------------|-------------------------------|-------------------|------------|
| <i>Ciona savignyi</i>           | csa-mir-92a   | reftig_1: 1336385-1336487     | Intergenic region | +          |
|                                 | csa-mir-92b   | reftig_1: 1335375-1335474     | Intergenic region | +          |
|                                 | csa-mir-92c   | reftig_1: 1335536-1335626     | Intergenic region | +          |
| <i>Ciona robusta</i>            | cin-mir-92a   | 3p: 1864426-1864526           | Intergenic region | +          |
|                                 | cin-mir-92b   | 1p: 2635676-2635776           | Intergenic region | -          |
|                                 | cin-mir-92c   | 3p: 1865219-1865319           | Intergenic region | +          |
|                                 | cin-mir-92d   | 3p: 1864796-1864851           | Intergenic region | +          |
|                                 | cin-mir-92e   | 1p: 2635396-2635447           | Intergenic region | -          |
| <i>Homo sapiens</i>             | hsa-mir-92a-1 | chr13: 91351314-91351391      | Promoter region   | +          |
|                                 | hsa-mir-92a-2 | chrX: 134169538-134169612     | Exon              | -          |
|                                 | hsa-mir-92b   | chr1: 155195177-155195272     | Promoter region   | +          |
|                                 | hsa-mir-17    | chr13: 91350605-91350688      | Promoter region   | +          |
|                                 | hsa-mir-18a   | chr13: 91350751-91350821      | Promoter region   | +          |
|                                 | hsa-mir-19a   | chr13: 91350891-91350972      | Promoter region   | +          |
|                                 | hsa-mir-20a   | chr13: 91351065-91351135      | Promoter region   | +          |
|                                 | hsa-mir-19b-1 | chr13: 91351192-91351278      | Promoter region   | +          |
| <i>Mus musculus</i>             | mmu-mir-92a-1 | chr14: 115044427-115044506    | Promoter region   | +          |
|                                 | mmu-mir-92a-2 | chrX: 52741838-52741928       | Intergenic region | -          |
|                                 | mmu-mir-92b   | chr3: 89227116-89227198       | Promoter region   | -          |
|                                 | mmu-mir-17    | chr14: 115043671-115043754    | Promoter region   | +          |
|                                 | mmu-mir-18a   | chr14: 115043851-115043946    | Promoter region   | +          |
|                                 | mmu-mir-19a   | chr14: 115044000-115044081    | Promoter region   | +          |
|                                 | mmu-mir-20a   | chr14: 115044157-115044263    | Promoter region   | +          |
|                                 | mmu-mir-19b-1 | chr14: 115044305-115044391    | Promoter region   | +          |
| <i>Drosophila pseudoobscura</i> | dps-mir-92a   | 2: 23635276-23635369          | unknown           | -          |
|                                 | dps-mir-92b   | 2: 23630760-23630859          | unknown           | -          |
|                                 | dps-mir-92c   | 3: 8679866-8679980            | unknown           | +          |
| <i>Gallus gallus</i>            | gga-mir-92-1  | chr1: 148023263-148023340     | Intergenic region | -          |
|                                 | gga-mir-92-2  | chr4: 3994560-3994640         | Intergenic region | -          |
|                                 | gga-mir-17    | chr1: 148023974-148024058     | Intergenic region | -          |
|                                 | gga-mir-18a   | chr1: 148023819-148023911     | Intergenic region | -          |
|                                 | gga-mir-19a   | chr1: 148023685-148023765     | Intergenic region | -          |
|                                 | gga-mir-20a   | chr1: 148023499-148023596     | Intergenic region | -          |
|                                 | gga-mir-19b   | chr1: 148023376-148023462     | Intergenic region | -          |
| <i>Xenopus laevis</i>           | xla-mir-92a-1 | chr2L: 107331786-107331863    | unknown           | -          |
|                                 | xla-mir-92a-2 | chr8L: 48821825-48821900      | unknown           | -          |
|                                 | xla-mir-92a-3 | chr8S: 74307587-74307654      | unknown           | -          |
|                                 | xla-mir-92a-4 | chr2S: 91488294-91488353      | unknown           | -          |
|                                 | xla-mir-92b   | Sc000103_chrNA: 303236-303296 | unknown           | +          |

|                                      |               |                             |                |   |
|--------------------------------------|---------------|-----------------------------|----------------|---|
|                                      | xla-mir-17-2  | chr2L: 107332477-107332538  | unknown        | - |
|                                      | xla-mir-18b   | chr2L: 107332346-107332408  | unknown        | - |
|                                      | xla-mir-19a   | chr2L: 107332210-107332271  | unknown        | - |
|                                      | xla-mir-20a   | chr2L: 107332044-107332104  | unknown        | - |
| <i>Danio rerio</i>                   | dre-mir-92a-1 | chr1: 3297367-3297451       | Exon or intron | - |
|                                      | dre-mir-92a-1 | chr9: 53436280-53436374     | Exon or intron | - |
|                                      | dre-mir-92b   | chr16: 42898429-42898510    | Exon or intron | + |
|                                      | dre-mir-17a-1 | chr1: 3298112-3298249       | Exon or intron | - |
|                                      | dre-mir-18a   | chr1: 3298006-3298088       | Exon or intron | - |
|                                      | dre-mir-19a   | chr1: 3297848-3297936       | Exon or intron | - |
|                                      | dre-mir-20a   | chr1: 3297603-3297755       | Exon or intron | - |
|                                      | dre-mir-19b   | chr1: 3297484-3297570       | Exon or intron | - |
| <i>Branchiostoma floridae</i>        | bfl-mir-92a-1 | GG666632.1: 777177-777277   | unknown        | - |
|                                      | bfl-mir-92a-2 | GG666632.1: 774437-774518   | unknown        | - |
|                                      | bfl-mir-92a-3 | GG666632.1: 776303-776384   | unknown        | - |
|                                      | bfl-mir-92b   | GG666522.1: 372710-372810   | unknown        | + |
|                                      | bfl-mir-92c   | GG666522.1: 372242-372441   | unknown        | + |
|                                      | bfl-mir-92d   | GG666581.1: 210790-210872   | unknown        | + |
|                                      | bfl-mir-19    | GG666583.1: 3476282-3476363 | unknown        | - |
| <i>Saccoglossus kowalevskii</i>      | sko-mir-92a   | GL015959.1: 55312-55412     | unknown        | - |
|                                      | sko-mir-92b   | GL015959.1: 42157-42257     | unknown        | - |
|                                      | sko-mir-92c   | GL015959.1: 40764-40864     | unknown        | - |
| <i>Capitella teleta</i>              | cte-mir-92a   | KB294417.1: 594329-594429   | unknown        | - |
|                                      | cte-mir-92b   | KB294417.1: 595219-595319   | unknown        | - |
|                                      | cte-mir-92c   | KB294417.1: 594205-594305   | unknown        | - |
| <i>Strongylocentrotus purpuratus</i> | spu-mir-92a   | KN917153.1: 419786-419885   | unknown        | - |
|                                      | spu-mir-92b   | KN917153.1: 421925-422025   | unknown        | - |
|                                      | spu-mir-92c   | KN917153.1: 420245-420345   | unknown        | - |
|                                      | spu-mir-92d   | AAGJ05134155.1: 22230-22288 | unknown        | + |
|                                      | spu-mir-92e   | AAGJ05134155.1: 22757-22817 | unknown        | + |

**Table S3.** The number and percentage of the csa-miR-92c-KO embryos.

|                        | Eggs for Electroporation | Developmental Embryos | Cas9-Positive Embryos (C) | Embryos with Phenotype (P) | P/C   |
|------------------------|--------------------------|-----------------------|---------------------------|----------------------------|-------|
| 16 hpf (sgRNAs)        | 200-300                  | 25                    | 15                        | 6                          | 40%   |
| 16 hpf (sgRNA-control) | 200-300                  | 27                    | 21                        | 3                          | 14.3% |
| 21 hpf (sgRNAs)        | 200-300                  | 21                    | 13                        | 4                          | 30.8% |
| 21 hpf (sgRNA-control) | 200-300                  | 33                    | 25                        | 4                          | 16%   |
| 31 hpf (sgRNAs)        | 200-300                  | 32                    | 21                        | 2                          | 9.5%  |
| 31 hpf (sgRNA-control) | 200-300                  | 31                    | 24                        | 3                          | 12.5% |

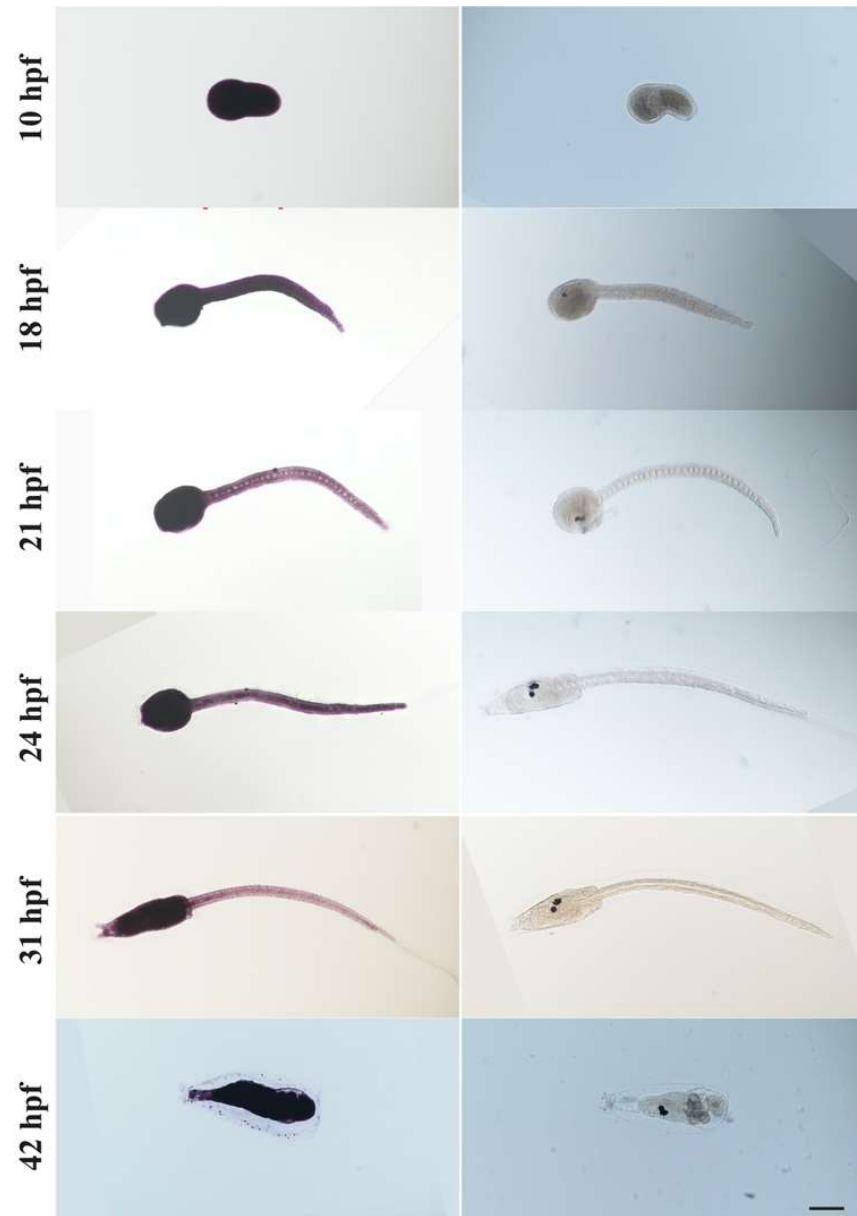

**Figure S1.** Expression patterns of *csa-miR-92c* detected by *in situ* hybridization. Embryos and larvae at 10, 18, 21, 24, 31, and 42 hpf were hybridized with LNA probes of *csa-miR-92c*. The developmental stages were indicated in the left. The results of sense probes were indicated in the right. The signals of *csa-miR-92c* were detected in the whole body at 10 hpf and 42 hpf and were found to be expressed in the trunk, notochord cells, and epithelial cells at 18, 21, 24, and 31 hpf. The red frame indicated the regions of zoom-in images in the middle column. Scale bars represent 100  $\mu\text{m}$ .

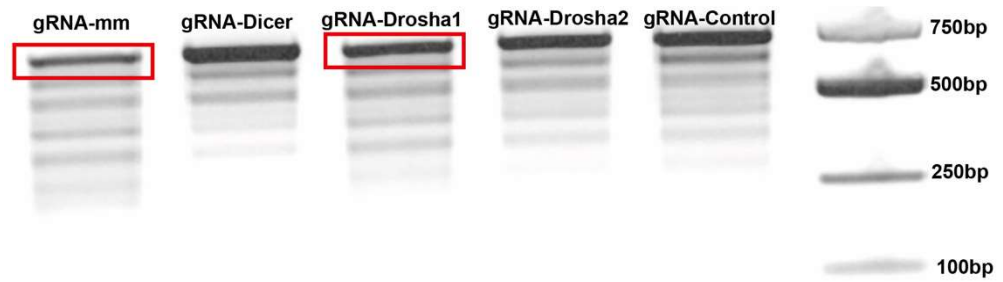

**Figure S2.** The sgRNA efficiency verification by T7 endonuclease I assay. The efficiency of four gRNAs in *Ciona* was detected by T7 endonuclease I assay. The percentages of gene modification by gRNA-mm and gRNA-Drosha1 (pointed in the red box) were 11.3% and 1.4%, respectively. gRNA-mm: the gRNA designed at the mature sequence of *csa-miR-92c*; gRNA-Dicer: the gRNA designed at the active site of Dicer of *csa-miR-92c*; gRNA-Drosha1: the gRNA designed at the active site of Drosha of *csa-miR-92c*; gRNA-Drosha2: the gRNA designed at the active site of Drosha of *csa-miR-92c*; gRNA-control, and marker.

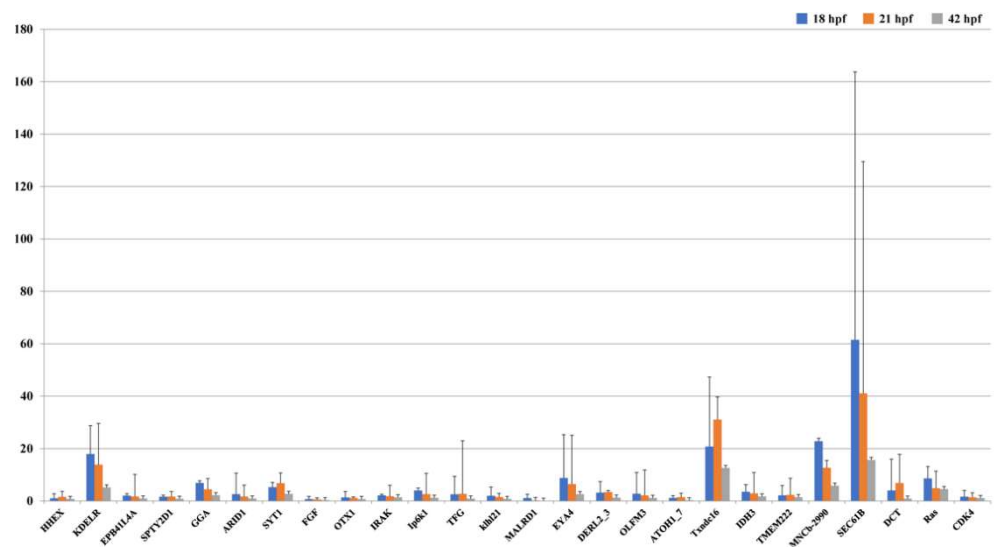

**Figure S3.** The relative expression levels of the downregulated target genes of *csa-miR-92c*. The relative expressions of these targeted genes were downregulated from 18 hpf to 42 hpf.

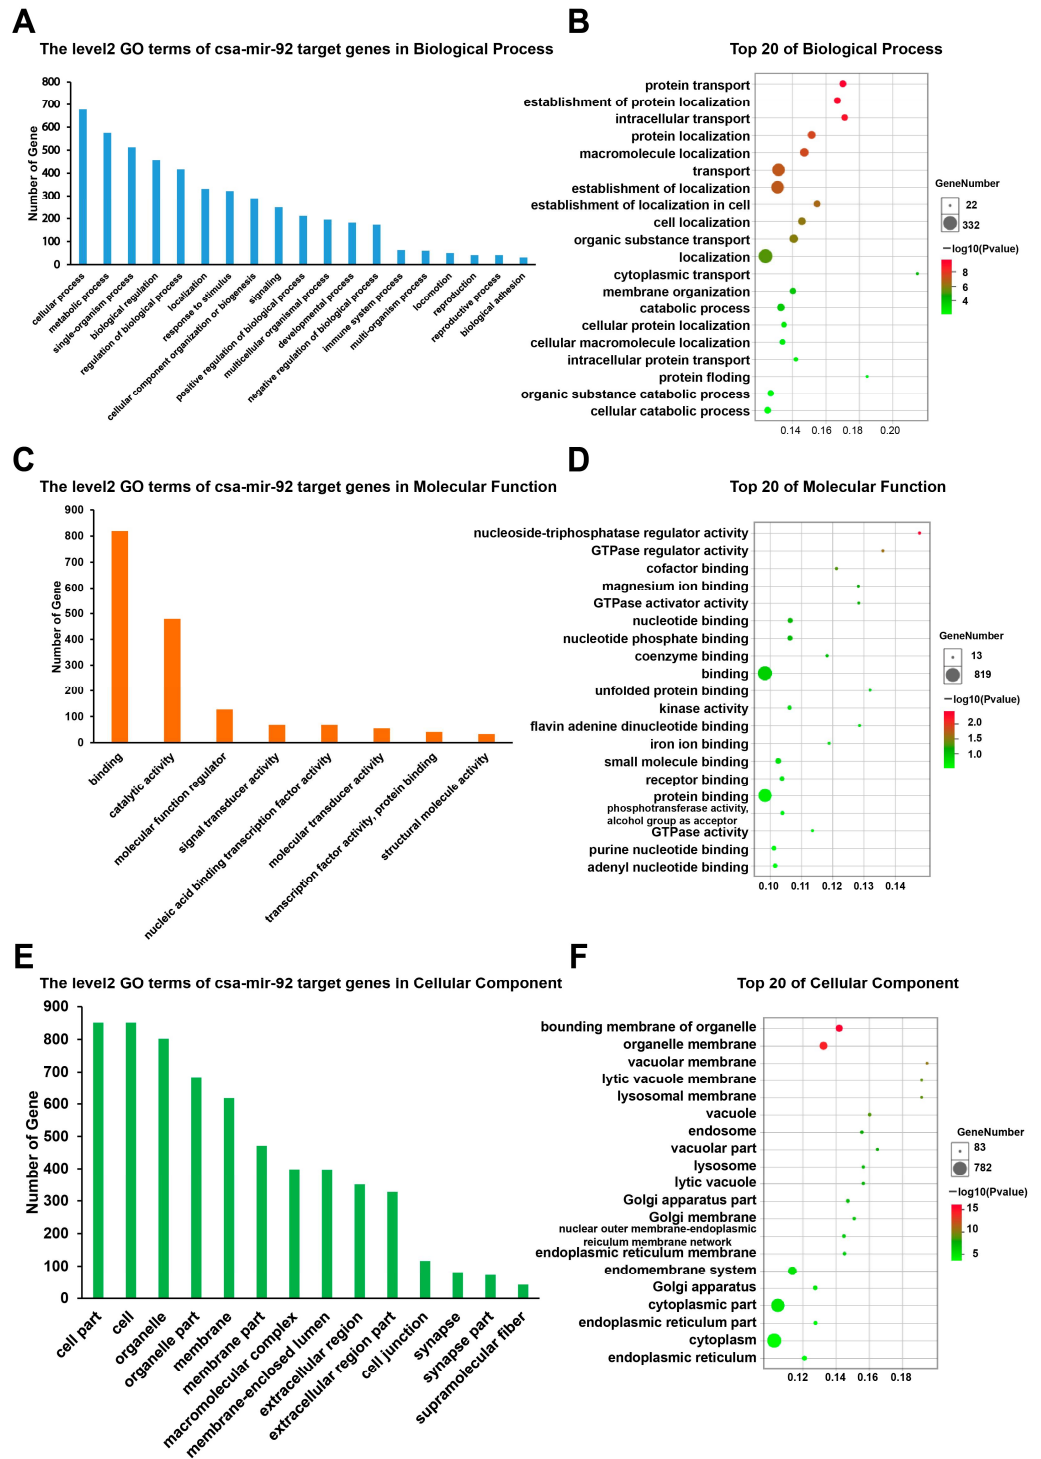

**Figure S4.** Gene ontology analysis of putative target genes of *csa*-miR-92. (A,C,E) The level2 Go terms of *csa*-miR-92 target genes in Biological process (A), molecular function (C), and cellular component (E) of Gene Ontology. The abscissa represents the more detailed first-level classification of the three ontologies of GO. The ordinate represented the number of genes contained in each category entry. The top 20 of Biological process (B), molecular function (D), and cellular component (F) of Gene Ontology. The left side of the bubble chart was the name of biological process, molecular function, or cellular component, and the below of the bubble chart was the rich factor. The bubble size indicated the gene number. The color bar depicted the level of the  $-\log_{10}(p\text{-value})$ . Green or red on the bubble indicated that the level of the  $-\log_{10}(p\text{-value})$  is decrease or increase, respectively.

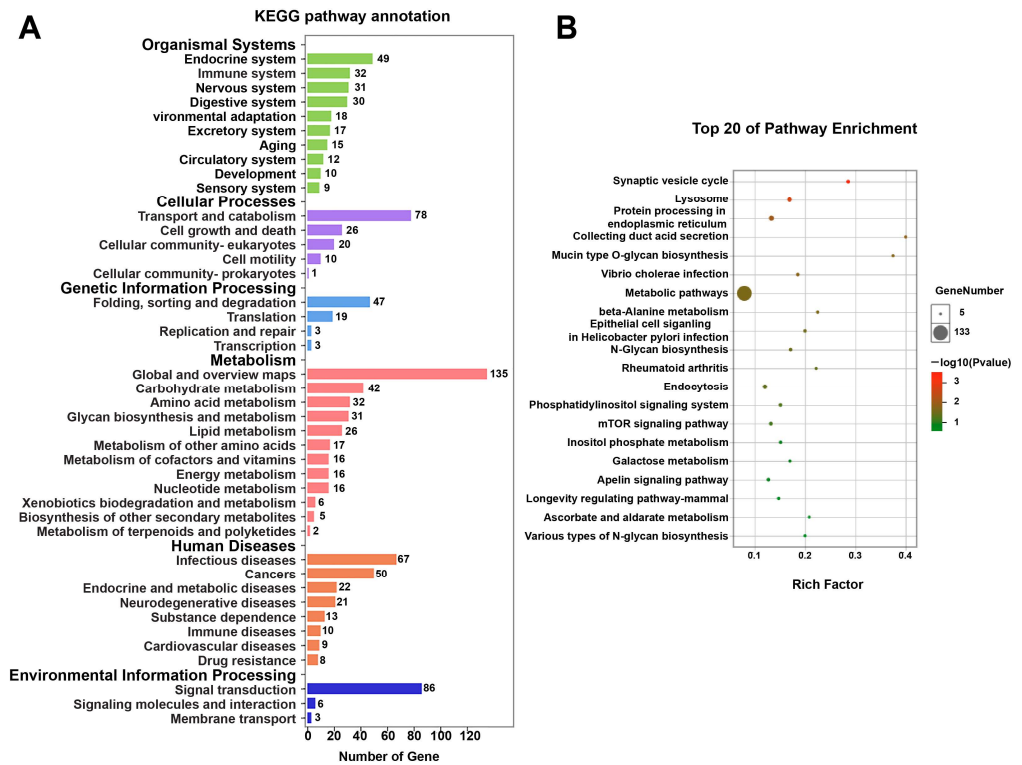

**Figure S5.** Pathway enrichment analysis of putative target gene of *csa-mir-92*. **(A)** The KEGG pathway annotation. The information on the left of the chart was divided into six categories, namely Organismal Systems, Cellular Processes, Genetic information Processing, Metabolism, Human diseases, and Environmental Information Processing, respectively. Different colors represented the different categories. The number of genes was marked on the right of the bar. **(B)** The top 20 pathway enrichments of the KEGG analysis. The left side of the bubble chart was the information of pathway, and the below of the bubble chart was the rich factor. The bubble size indicated the gene number. The color bar depicted the level of the  $-\log_{10}(p\text{-value})$ . Green or red on the bubble indicated the level of the  $-\log_{10}(p\text{-value})$  was decreased or increased, respectively.
